# Supplementary material for: NUDT7 Loss Promotes KrasG12D CRC Development
Source: PubMed Central journal article supplement (PMC7139971; doi:10.3390/cancers12030576), 2020-03-02
Supplement: cancers-12-00576-s001.pdf [file cancers-12-00576-s001.pdf]

## Supplementary materials

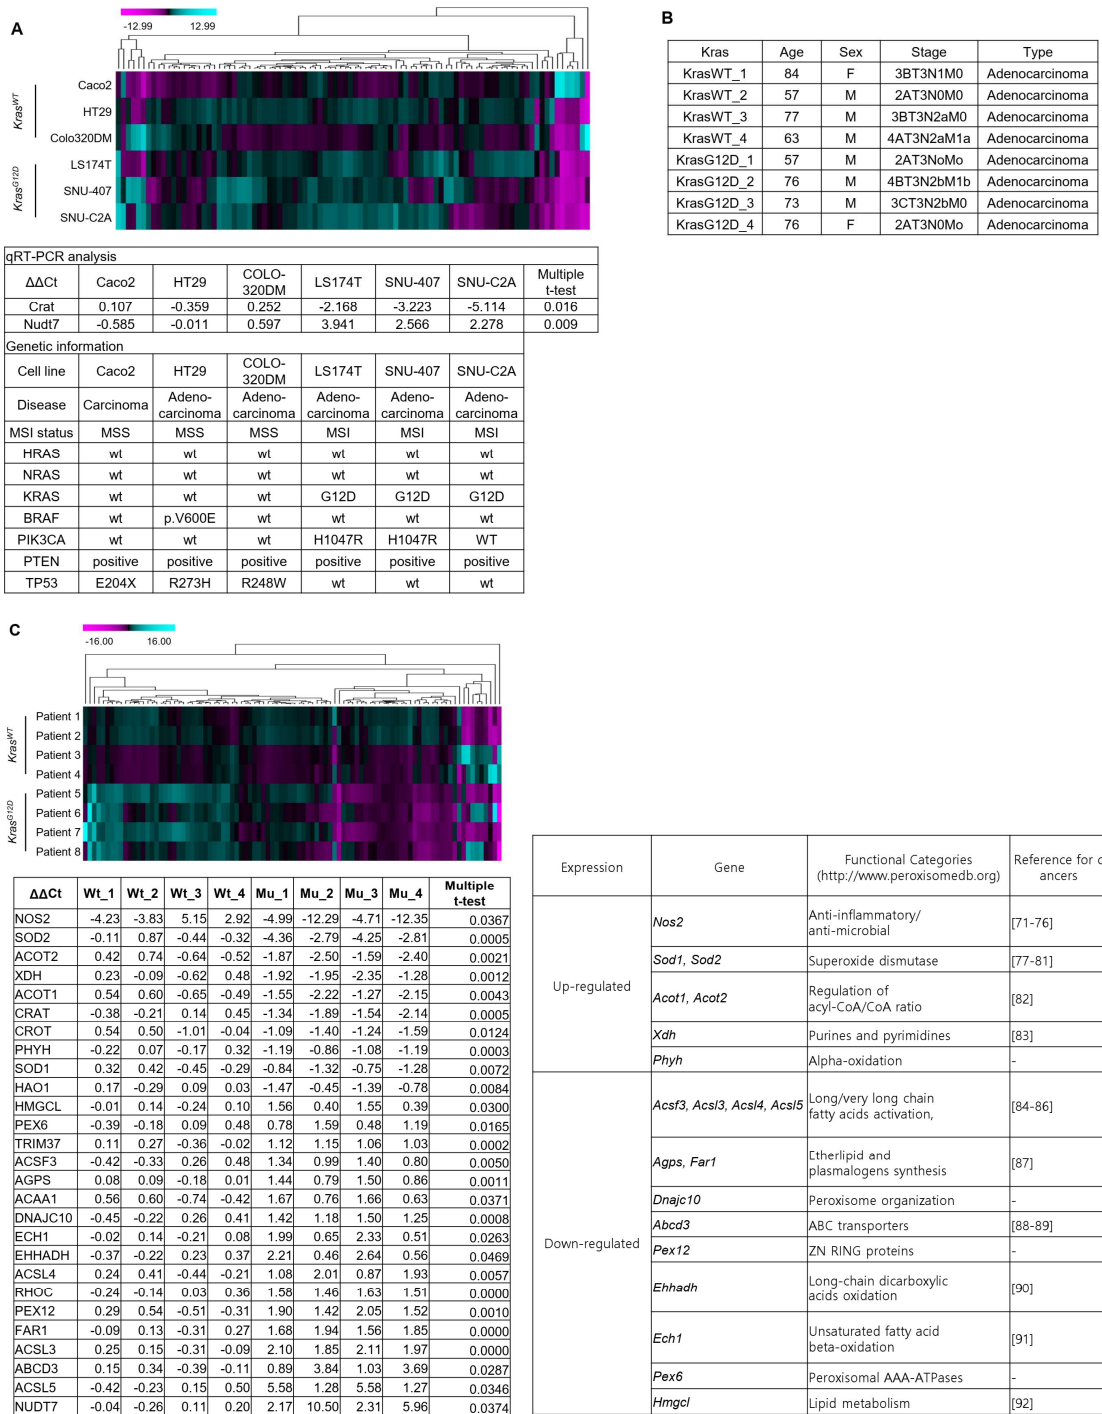

**Figure S1.** Decreased level of *Nudt7* expression in *Kras*<sup>G12D</sup> tumor. **(A)** The expression level of peroxisomal genes in *Kras*<sup>G12D</sup> cell lines (LS-174T, SNU-C2A, and SNU-407) compared with *Kras*<sup>WT</sup> cell lines (Caco2, HT-29, COLO-320DM). **(B)** Characteristics of the tumor patients. **(C)** The expression level of Peroxisomal genes in CRC tumor biopsy with *Kras*<sup>G12D</sup> ( $n = 4$ ) compared to CRC tumor biopsy with *Kras*<sup>WT</sup> ( $n = 4$ ). Multiple *t*-test was used for statistical analysis (left panel), and categorized peroxisomal genes and references in various cancers include the colorectal cancer (right panel) [1–23].

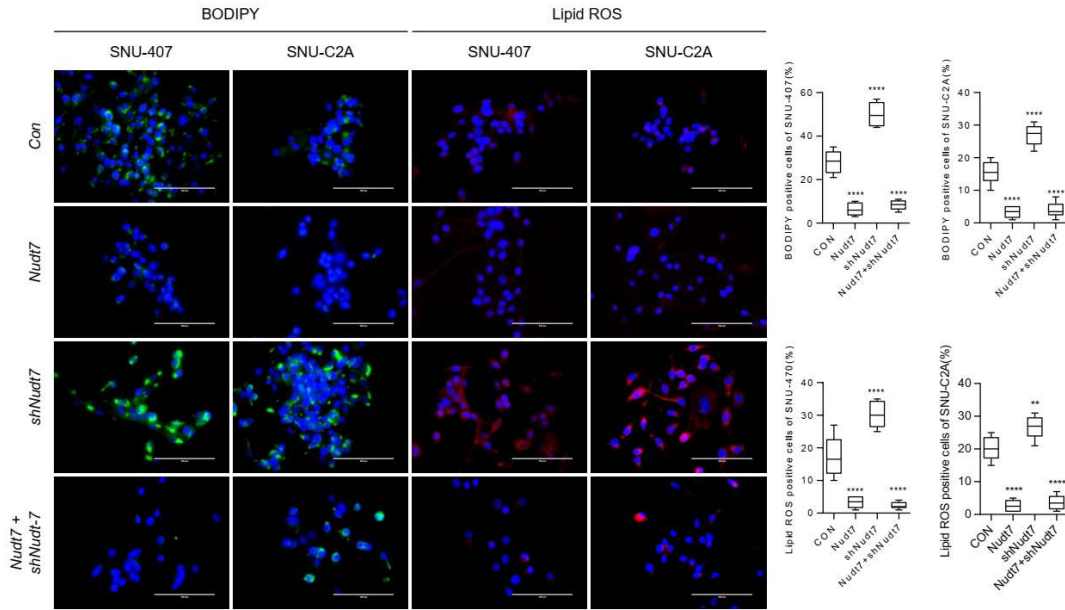

**Figure S2.** *Nudt7* is involved in lipid homeostasis. Lipid accumulation and lipid oxidative stress (ROS) were measured using BODIPY<sup>493/503</sup> and lipid deep red neutral lipid stain, respectively, and positive cells were counted. Scale bars: 100  $\mu$ m. Values are means + SD. A two-tailed Student's *t*-test was used for statistical analysis. \*\*  $P < 0.01$ , \*\*\*\*  $P < 0.0001$ .

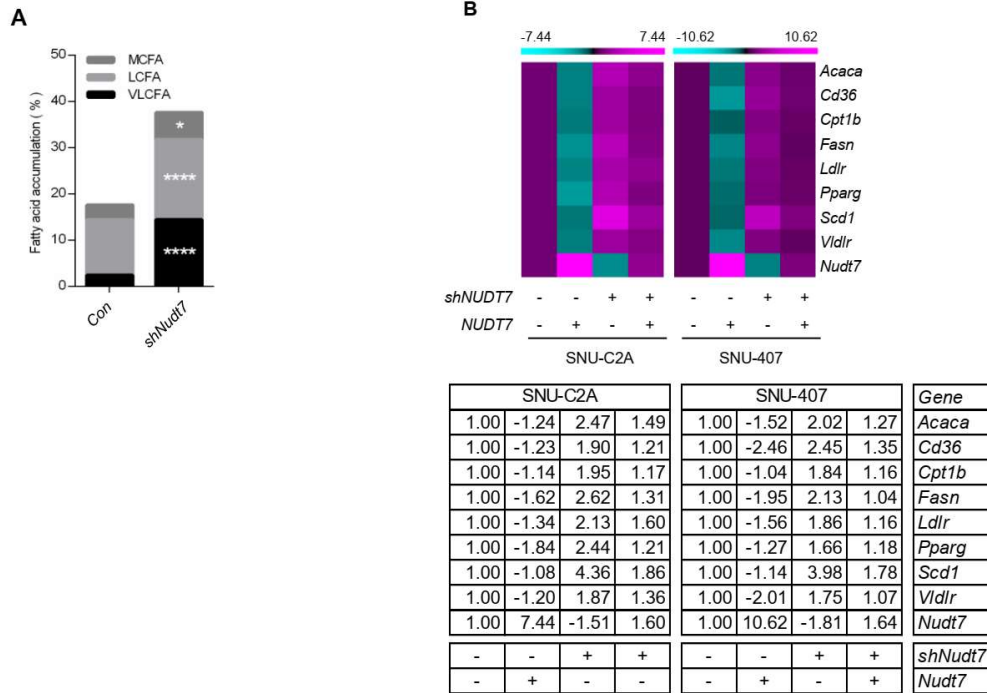

**Figure S3.** Dysregulation of lipid homeostasis is induced by *Nudt7* deficiency. (A) Lipidomics analysis of Caco2 cells transduced with lentiviruses containing shRNA specific to *Nudt7* (*shNudt7*) using gas chromatography/mass spectrometry (GC/MS;  $n = 3$ ). (B) Expression level of genes involved in lipogenesis was analyzed by real-time PCR and normalized with *Rn18s* ( $n = 3$ ).

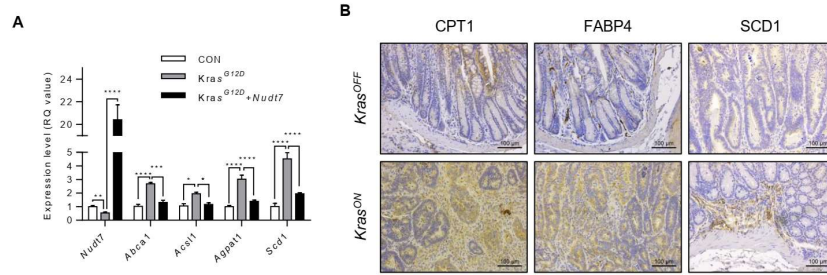

**Figure S4.** Dysregulation of lipid metabolism in *Kras<sup>G12D</sup>* CRC. **(A)** Expression level of *Nudt7* and lipid metabolic genes in Caco2 cells transfected with *Kras<sup>G12D</sup>* in the absence or presence of *Nudt7*. *Rn18s* was used as an endogenous control ( $n = 3$ ). **(B)** Immunohistochemistry with CPT1, FABP4, and SCD1 using tamoxifen-inducible *Villin-CreER<sup>T2</sup>; Apc<sup>fl/fl</sup>; Trp53<sup>fl/fl</sup>; tetO-LSL-Kras<sup>G12D</sup>* mice (+Dox) ( $n = 5$ ). Scale bars: 100  $\mu$ m.

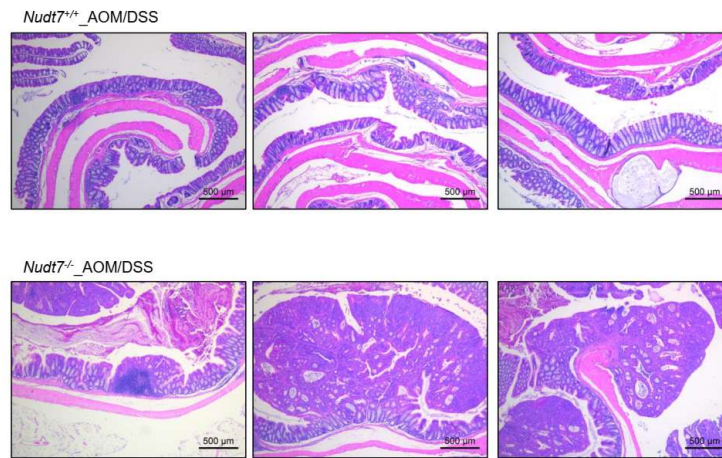

**Figure S5.** Development of adenocarcinoma in *Nudt7<sup>-/-</sup>\_AOM/DSS* colon. Low magnified H&E images (40 $\times$  magnification, Scale bars: 500  $\mu$ m) for Figure 4B.

Figure S6

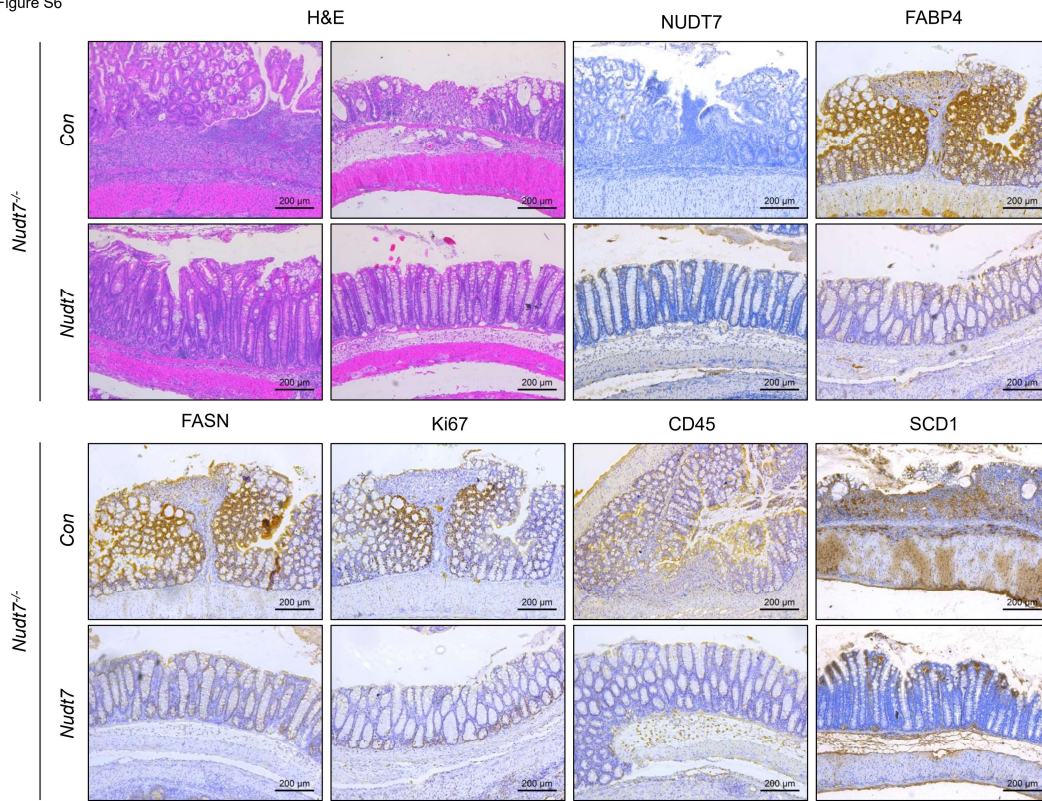

**Figure S6.** Restoration of *Nudt7* into *Nudt7*<sup>-/-</sup> mice reduces the expression levels of lipid metabolic and proliferation factors. Lentiviruses containing *Nudt7* were injected into tail vein of *Nudt7*<sup>-/-</sup> mice and stained with NUDT7, FABP4, FASN, Ki67, CD45, and SCD1. Scale bars: 100 µm.

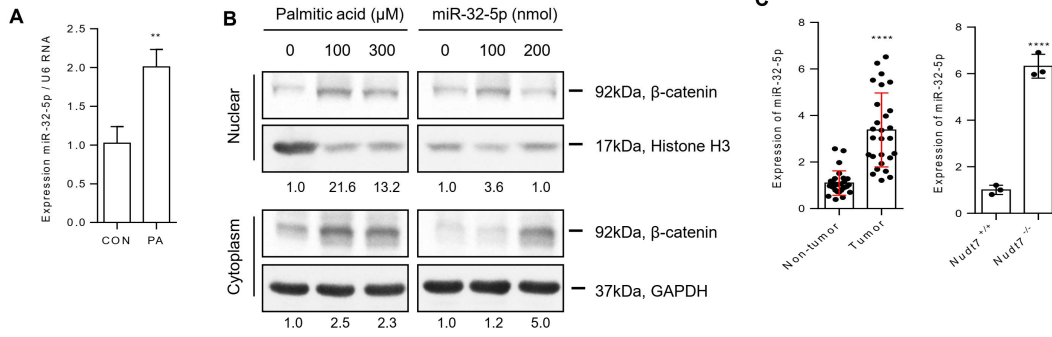

**Figure S7.** Palmitic acid induced expression level of miR-32-5p and an increased level of miR-32-5p activates Wnt/ $\beta$ -catenin signaling. (A) The expression level of miR-32-5p in Caco2 cells treated with or without palmitic acid (PA) was analyzed by real-time PCR ( $n = 3$ ). *U6* was used as an endogenous control (B) The expression levels of  $\beta$ -catenin was analyzed using immunoblotting in Caco2 cells treated with PA or miR-32-5p mimic. Histone H3 or GAPDH were used as a loading control for nuclear protein or total protein lysate. (C) The expression level of miR-32-5p in CRC tumor compared with normal ( $n = 27$ ) or in *Nudt7*<sup>-/-</sup> colon compared with *Nudt7*<sup>+/+</sup> colon ( $n = 3$ ) were analyzed by real-time PCR. *Rn18s* was used as an endogenous control.

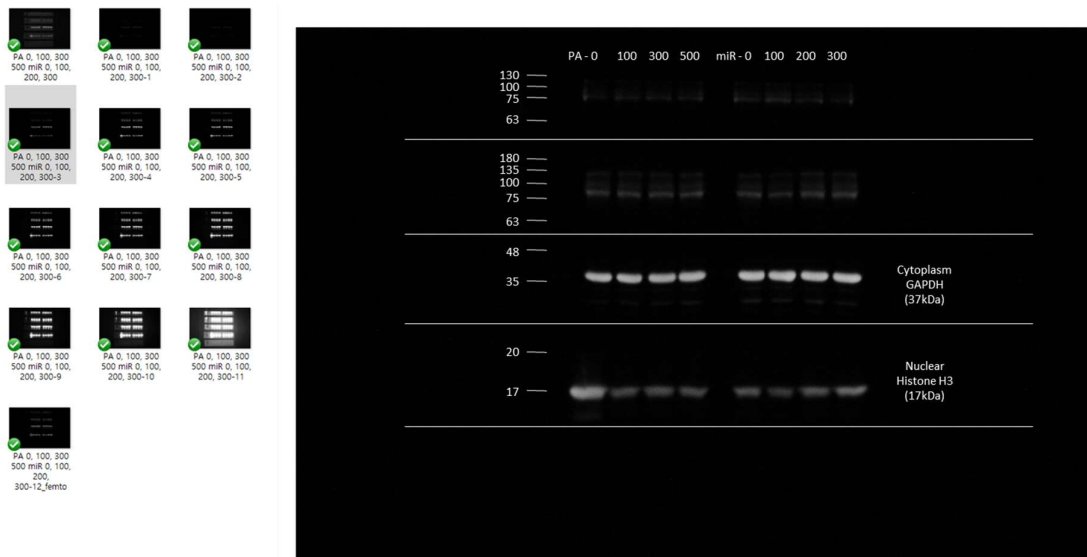

Uncropped images for Figure S7.

**Table S1.** Lipidomics analysis of CRC using gas chromatography/mass spectrometry (GC/MS). Palmitic acid is indicated in red.

| Non-Tumor                       | Carbon | %     | Tumor                                                                   | Carbon | %     |
|---------------------------------|--------|-------|-------------------------------------------------------------------------|--------|-------|
| Indole                          | 8      | 4.267 | <b>Palmitic acid</b>                                                    | 16     | 3.411 |
| <b>Palmitic acid</b>            | 16     | 1.885 | cis-Vaccenic acid                                                       | 18     | 3.031 |
| Dodecanamide                    | 12     | 1.850 | Dodecanamide                                                            | 12     | 2.700 |
| Oleic acid                      | 18     | 1.694 | Stearic acid                                                            | 18     | 2.293 |
| Palmitaldehyde                  | 16     | 1.584 | 1-Hexadecene                                                            | 16     | 1.234 |
| ether, methyl 1-octadecenyl     | 19     | 1.438 | Tetradecanal                                                            | 14     | 1.140 |
| 9-Octadecenal                   | 18     | 0.855 | Linoleic acid                                                           | 18     | 1.083 |
| Coprosterol                     | 27     | 0.746 | Coprosterol                                                             | 27     | 1.073 |
| Palmitamide                     | 16     | 0.659 | ether, 1-hexadecenyl<br>methyl                                          | 17     | 0.427 |
| Squalene                        | 30     | 0.365 | Palmitamide                                                             | 16     | 0.414 |
| Tetradecanal                    | 14     | 0.336 | Palmitaldehyde                                                          | 16     | 0.400 |
| Linoleic acid                   | 18     | 0.330 | Ether,methyl 1-<br>octadecenyl                                          | 19     | 0.380 |
| Stearic acid                    | 18     | 0.307 | 8-Octadecenoic acid                                                     | 18     | 0.307 |
| Tetradecane                     | 14     | 0.276 | cholest-7-en-3-ol,<br>(3.beta.,5.alpha.)-                               | 29     | 0.275 |
| Arachidonic acid methyl ester   | 21     | 0.272 | Arachidonic acid methyl<br>ester                                        | 21     | 0.212 |
| Docosane                        | 22     | 0.244 | 1-Methoxy-1-hexadecene                                                  | 17     | 0.200 |
| 18alpha-Oleanane                | 30     | 0.232 | Arachidonic acid                                                        | 20     | 0.175 |
| 1-Methoxy-1-hexadecene          | 17     | 0.222 | Ether,methyl 1-<br>octadecenyl                                          | 19     | 0.175 |
| 1-Hexadecene                    | 16     | 0.167 | Docosane                                                                | 22     | 0.172 |
| Eicosane                        | 20     | 0.160 | Squalene                                                                | 30     | 0.167 |
| Salicylaldehyde azine           | 14     | 0.134 | Cyclotetradecane                                                        | 14     | 0.145 |
| 2-Methyl-3-phenyl-1H-indole     | 15     | 0.129 | 2-Methyl-3-phenyl-1H-<br>indole                                         | 15     | 0.140 |
| 2-Methyl-1-anthracenamine       | 15     | 0.126 | Tetradecane                                                             | 14     | 0.116 |
| Oxyquinoline                    | 9      | 0.124 | Oleic acid                                                              | 18     | 0.105 |
| Tetradecyl trifluoroacetate     | 16     | 0.099 | Squalene                                                                | 30     | 0.094 |
| Petroselaidic acid              | 18     | 0.077 | Methostenol                                                             | 28     | 0.081 |
| DITRIDECYL PHTHALATE            | 34     | 0.072 | trimethyl(4-tert-<br>butylphenoxy)silane                                | 13     | 0.074 |
| Heneicosane,11-(1-ethylpropyl)- | 26     | 0.062 | Hexadecanoic acid,1,1'-[1-<br>(hydroxymethyl)- 1,2-<br>ethanediyl ester | 35     | 0.065 |

**Table 2.** List of cell lines used in this study.

| Cell line | KRAS   | TP53                 | BRAF              | PIK3CA   | PTEN                 | MSI | Note                        |
|-----------|--------|----------------------|-------------------|----------|----------------------|-----|-----------------------------|
| CaCo2     | wt     | p.E204X              | wt                | wt       | wt                   | MSS | In this study<br>/ GSE97023 |
| CL-34     | wt     | p.S127P;<br>p.K382fs | p.V600E           | wt       | wt                   | MSI | GSE97023                    |
| Co115     | wt     | wt                   | p.V600E           | wt       | p.E157fs; p.R233X    | MSI | GSE97023                    |
| Colo205   | wt     | p.Y107fs; p.Y103fs   | p.V600E           | wt       | wt                   | MSS | GSE97023                    |
| Colo320   | wt     | p.R248W              | wt                | wt       | wt                   | MSS | In this study<br>/ GSE97023 |
| HT29      | wt     | p.R273H              | p.V600E; p.T119Sc | wt       | wt                   | MSS | In this study<br>/ GSE97023 |
| KM12b     | wt     | p.P72fs; p.H179R     | p.P403fs          | wt       | p.G129X;<br>p.K267fs | MSI | GSE97023                    |
| NCI-H508  | wt     | p.R273H              | p.G596R           | p.E545K  | wt                   | MSS | GSE97023                    |
| RKO       | wt     | wt                   | p.V600E           | p.H1047R | wt                   | MSI | GSE97023                    |
| SW48      | wt     | wt                   | p.R347Xc          | p.G914Rc | wt                   | MSI | GSE97023                    |
| V9P       | wt     | p.G245D              | wt                | wt       | wt                   | MSS | GSE97023                    |
| WiDr      | wt     | p.R273H              | p.V600E; p.T119Sc | wt       | wt                   | MSS | GSE97023                    |
| CL-40     | p.G12D | p.R248Q              | wt                | wt       | wt                   | MSS | GSE97023                    |
| Colo678   | p.G12D | wt                   | wt                | wt       | wt                   | MSS | GSE97023                    |
| EB        | p.G12D | wt                   | wt                | p.E545K  | wt                   | MSS | GSE97023                    |
| IS1       | p.G12D | p.Y163H              | wt                | wt       | wt                   | MSS | GSE97023                    |
| IS3       | p.G12D | p.Y163H              | wt                | wt       | wt                   | MSS | GSE97023                    |
| LS174T    | p.G12D | wt                   | p.D211Gc          | p.H1047R | wt                   | MSI | In this study<br>/ GSE97023 |
| SNU-407   | p.G12D | wt                   | p.R726C           | p.H1047R | wt                   | MSI | In this study               |
| SNU-C2A   | p.G12D | p.R141Y              | wt                | wt       | wt                   | MSI | In this study               |
| TC71      | p.G12D | p.C176Y; p.R213X     | wt                | p.R88Qc  | p.R233X              | MSI | GSE97023                    |

**Table S3.** List of real-time PCR primer used in this study.

| Group                                                                                              | Gene Name | Forward                | Reverse                  |
|----------------------------------------------------------------------------------------------------|-----------|------------------------|--------------------------|
| Peroxisome genes (Human) <a href="http://www.peroxisome.db.org/">http://www.peroxisome.db.org/</a> | ABCD1     | ATGCAAAGGAAGGGCTACTC   | CGTCCTTCCAGTCACACATAG    |
|                                                                                                    | ABCD2     | AAGAGAAGGAGGATGGGATG   | GGTACATTCATCCAGCAAGG     |
|                                                                                                    | ABCD3     | TGTCAGTCGCCCTTTCTTAG   | CTATTTCGACCCAGAGCTTGA    |
|                                                                                                    | ABCD4     | TGAGCATCTTCGGGTATTTT   | TCTGCATGTGCTTGAACCTA     |
|                                                                                                    | ACAA1     | TAGCAGGTGGCATCAGAAATG  | CTCCATCAAGCGCGAAGTAATA   |
|                                                                                                    | ACAD11    | GCTGGTGTITCCCAGGATTA   | CAGCTCCATTGTTGCGATTG     |
|                                                                                                    | ACBD5     | AATTGCTGCGTGCATAGGT    | TTTGGCGTTTGGAGTAGAAG     |
|                                                                                                    | ACOT1     | GGTGACCAAAGATGGCTATG   | TGACCTACCAGGAACAGGAA     |
|                                                                                                    | ACOT12    | AGCACAAGCATGGAGATCAG   | GTGGAGAAAGCCACACTAACA    |
|                                                                                                    | ACOT2     | CTTGGTGGGCAGTCTATTATC  | CCCAAGTGTITGTGGAAGAAAG   |
|                                                                                                    | ACOT4     | CCACGTTGGCTCTAGCTTATT  | GCATGTAGCATACGGCTTCT     |
|                                                                                                    | ACOT8     | GGACCCTAACCTCCAAAAGA   | ATCTGTTTGGGCTCCATTCT     |
|                                                                                                    | ACOX1     | CAGGAATTACCGTTGGTGAC   | ITCACCTGGGCATACTTCAT     |
|                                                                                                    | ACOX2     | ACATGGCAAGAACAGCCTAC   | TCATAACAGCCAAGTGCTGA     |
|                                                                                                    | ACOX3     | TTGCTCTGACCGAATTAAGC   | CGAAATCAGGGGAATGTATG     |
|                                                                                                    | ACSF3     | ACACGTACAGGGAGCTTTATT  | GTTAGCGCATAGGAAGGAGAC    |
|                                                                                                    | ACSL1     | ACGAAGATCCGCACTACTTG   | CAAGGGCCATTATTTGACAC     |
|                                                                                                    | ACSL3     | AAGCTTGCTAGGGGAAATA    | ACCAACAGGACAGCAGAAAC     |
|                                                                                                    | ACSL4     | GCAGAGTACCCTGAAGGATTTG | CGTTGGTCTACTTGGAGGAATG   |
|                                                                                                    | ACSL5     | TACCTGGGTTCTGTCTCTT    | GATGATCCACTCTGGCCTATT    |
|                                                                                                    | ACSL6     | TATCCGCCTTCTCTCAGATG   | CTGGCTGAAGATCTTGTCTG     |
|                                                                                                    | AGPS      | GTTGGCAGCTGGAGAAGATA   | CCAAGGAGCAGAAGTCTCAA     |
|                                                                                                    | AGXT      | GGTCCATGAGCAAGGATATGT  | CAGAGATGACCAGTGTGAGTG    |
|                                                                                                    | ALDH3A2   | CATGCTGGATGAGGCCTATATT | AGTGGCTGAATGGTGAAGAC     |
|                                                                                                    | AMACR     | GCTGGCCACGATATCAACTAT  | CAAAGTCAGCCAGGAGATTCA    |
|                                                                                                    | BAAT      | GCTGAAGAGACATGGGAAGAA  | GCACAGCACAGAGGAGAATAG    |
|                                                                                                    | CAT       | AATCCATTGATCTCACCAA    | GGTCGAAGGCTATCTGTTC      |
|                                                                                                    | CRAT      | AGACAAGGTGAACCGGATTCCG | GGCTGCGGTACACGTCTTCTGA   |
|                                                                                                    | CROT      | GCACTTCAGCTGGCCTATTA   | ACTGCTTCAACTGTGCATGA     |
|                                                                                                    | DAO       | GTCCTAATCTCGGGCTACAAC  | AACCAGCCATAGCCGTAATC     |
|                                                                                                    | DDO       | CTGACGTGGTCTGGGATTT    | GGCATTACATTTAGGGTTG      |
|                                                                                                    | DECR2     | ATACGGTGATTGCCAGTAGG   | TCGGACGTCCATAGAGAGAG     |
|                                                                                                    | DNAJC10   | CTTCAGTGGTCTCCCTTACAC  | GATGACACCACGGAGAATAGAA   |
|                                                                                                    | DNM1L     | GCAAAGGATCATTGAGCACT   | CAGGCAACCTTTTACGAAGA     |
|                                                                                                    | ECH1      | AAGAGGAATGCCATGAACAA   | AACATTTTCTGCACCAGA       |
|                                                                                                    | EHHADH    | TCTAGAAAGGGGCAAGGTCT   | TTACAGAGCACATCAGGAA      |
|                                                                                                    | EPHX2     | CATCTGCTCCTCCGAAATAG   | CTTGAGAGAGGCCAGTTTATC    |
|                                                                                                    | FAR1      | GAGCTACCGGTTTCTAGGG    | GTGGTGTCTGTCCAGCTTTC     |
|                                                                                                    | FAR2      | AGCAACAGCTTCACATCACA   | TTAAAAGCCGATTGATGAGC     |
|                                                                                                    | FIS1      | GACAAGGCCATGAAGAAAGA   | GGATTTGGACTTGGACACAG     |
|                                                                                                    | GNPAT     | TTTTTGTGCGCCCATCCTTAG  | AAAACATCACGTAGGAAGCGAAAG |
|                                                                                                    | GSTK1     | CCTGTGCCGGTATCAGAATATC | GAGGCTTGTITCCACTGTCT     |
|                                                                                                    | HACL1     | ATGCTGGTACTTTGGAACA    | GAAAACCCAAATGCACTGTC     |
|                                                                                                    | HAO1      | AGGCAGAGAAGATGGGCTACAA | TTTTCATCCTGAGTTGTGGCGG   |
|                                                                                                    | HAO2      | GGAGATCAGTGCCCCTATTT   | GCAAATGTGCTGGTGATGTA     |
|                                                                                                    | HMGCL     | AAGGGCATTGAGAAGTTTCC   | GGCAGCTCCAAAGATGACTA     |
|                                                                                                    | HSD17B4   | GGCTTTGTCACGAGAGTTGT   | CAGGAGTCATTGGGTGATTC     |
|                                                                                                    | IDE       | CAAGTCAGCTGGTTCGGTATAG | GCTTTGCATGTCTGTTTGGTAG   |
|                                                                                                    | IDH1      | CTAAGGGTTGGCCTTTGTATCT | GGGACTTGTACTGCTTGTGATA   |
|                                                                                                    | IDI1      | CACCGAAAATAAGCTTCTGC   | GCTGGATTGCTTAATGGATG     |
|                                                                                                    | IDI2      | AGTCACGTTTCTGGGTATTT   | CACTCCGATGGCATCCTTT      |
|                                                                                                    | MLYCD     | ACATCCAGGCAATCGTGAAG   | CTGGGTCAAGCTGATGGAATAA   |



|                                                                                                            |                        |                          |                         |
|------------------------------------------------------------------------------------------------------------|------------------------|--------------------------|-------------------------|
|                                                                                                            | <i>Mosc2</i>           | ACCTGGGATGAACTCCTAATTG   | AGTGGCTGTTTCCTGTCTATG   |
|                                                                                                            | <i>MPV17</i>           | GCCAAACTACAGCGGGATTA     | GGACAGGTAGGAGTTCCAGATA  |
|                                                                                                            | <i>MVK</i>             | AGAGCAAGTGGAGAAGCTAAAG   | CGGCAGATGGACAGGTATAAG   |
|                                                                                                            | <i>NOS2</i>            | GTCAGAGTCACCATCCTCTTTG   | GCAGCTCAGCCTGTACTTATC   |
|                                                                                                            | <i>NUDT12</i>          | AGGAGGAAGATGGATTGGTTGCCT | CAGAAAGGGCTGGCATAGGAGGA |
|                                                                                                            | <i>NUDT7</i>           | CTAAGGCCCGCTTAAGAAAGTA   | CGGACGGTGAACAACAAATG    |
|                                                                                                            | <i>PAOX</i>            | GGGAGTACCTCAAGAAGGAGAT   | CCAGGTTGAAGAAGGAGTTCAG  |
|                                                                                                            | <i>PECI</i>            | GACAGGGCAACATTTTCATACAC  | CTTGGCTGGGCTCATTATCT    |
|                                                                                                            | <i>PECR</i>            | CTTGGTGAACAATGGAGGAG     | GGAGCTGTAAACTGCTTTGC    |
|                                                                                                            | <i>PEX1</i>            | TTCCTTAGGCGTATCCTCCTT    | ATTCTAAGTCTGCAACAAGAG   |
|                                                                                                            | <i>PEX10</i>           | CTCTCAGATGTGGCTACTTT     | CTGGATGATGCTGACGTACT    |
|                                                                                                            | <i>PEX11A</i>          | GCTGCTCACCCTACTACTATTTC  | CCTGGGATGCTGATTCTCTT    |
|                                                                                                            | <i>PEX11B</i>          | TGCTAGACGTGGTCAGAAATG    | CCAGGGATAGATTAGGGTGAGA  |
|                                                                                                            | <i>PEX11G</i>          | GTGGTGGAGTTCGGTTGA       | GGTCATCAAAGAGTCGCAAGA   |
|                                                                                                            | <i>PEX12</i>           | CTTGCAGTTCCTTGACTGGT     | TTGGGTAAGAGGGGAGAATC    |
|                                                                                                            | <i>PEX13</i>           | TGGTCCTTACCTCATTGGGA     | ACGGCAGCAAAATCATATTC    |
|                                                                                                            | <i>PEX14</i>           | CCCTCACCTCATATCTCAGC     | GGGGAGCAGGTATTTCTTGT    |
|                                                                                                            | <i>PEX16</i>           | GAGCCTCCTGAGTGACAGAA     | GCGGTCATAGAAAGGAGAGC    |
|                                                                                                            | <i>PEX19</i>           | GGAGAGTGGGCAGTGATATG     | CATGCTGGAGTCTGAAGGT     |
|                                                                                                            | <i>PEX26</i>           | TGGATGTACTTCAGGCCATT     | ACAGGAACTTGTGGGAGACA    |
|                                                                                                            | <i>PEX3</i>            | GAAATCTCGTTGAGCAGCAT     | CCTGCACTGCTAATGGAGTT    |
|                                                                                                            | <i>PEX5</i>            | TACAGCAGCAGGGTACATCA     | CCCAGAAATCGACATCAGAC    |
|                                                                                                            | <i>PEX5L</i>           | GTCCACCTGAGTGGAGAATTTA   | GAGGCGGTTCCATAGTGAATAG  |
|                                                                                                            | <i>PEX6</i>            | AAACTGCAGGCCATCTTCTCCCGG | AGCCATCACACGGGCATCCTCA  |
|                                                                                                            | <i>PEX7</i>            | CATGTCCTCATCACCTGTAGTG   | CCTCCTGAGCGTGTCTTTAT    |
|                                                                                                            | <i>PHYH</i>            | GCTTTCGGAATGAGTTTGAA     | TGGACCTTCGTGATCATCTT    |
|                                                                                                            | <i>PIPOX</i>           | GAGAGAAGGTGGTGGAGATAAAC  | GCTGTGATGACCAAGCTCTTA   |
|                                                                                                            | <i>PMVK</i>            | TCAGCGGCAAGAGGAAATC      | CCTGAGCATACTGTTCTTGAG   |
|                                                                                                            | <i>PRDX1</i>           | CGCACCATTGCTCAGGATTA     | CCAACAGGGAGGTCATTTACAG  |
|                                                                                                            | <i>PRDX5</i>           | GGATGTTCCAAGACACACCT     | CCAGTCACAAAGGCATCATT    |
|                                                                                                            | <i>PXMP2</i>           | TTTGTCAAGCACTTGGGAACT    | CCTGTGAAGAAGAACCCGTA    |
|                                                                                                            | <i>PXMP3</i>           | GAATGCGAAGAGTGCAAAACAG   | CTGAGTAAACTGGGACCAAAT   |
|                                                                                                            | <i>PXMP4</i>           | TGCCCTGCAGTCTACATAC      | TGTTGATCTGGCTGTTGATG    |
|                                                                                                            | <i>RHOC</i>            | TGTCATCCTCATGTGCTTCTC    | CTTGCCTCAGGTCCTTCTTATT  |
|                                                                                                            | <i>SCP2</i>            | AGGGAAGCCTTGAATAAAA      | TCCAGCATACCCAAACATCT    |
|                                                                                                            | <i>SLC22A5</i>         | CTCTCAGGGACGATTTGAAGAG   | CTCACTCGGGTCAAAGATAGTG  |
|                                                                                                            | <i>SLC25A17</i>        | CTGCTGCTCCAATTTTGCT      | CCTGCAACAAACCCAACTAC    |
|                                                                                                            | <i>SLC27A2</i>         | CTCTTGCTTGCAGACTAAA      | CCGAAGCAGTTCACCGATATAC  |
|                                                                                                            | <i>SOD1</i>            | GTGCAGGGCATCATCAATTTTC   | GGCCTTCAGTCAGTCTTTAAT   |
|                                                                                                            | <i>SOD2</i>            | GGAGATGTTACAGCCCAGATAG   | CGTTAGGGCTGAGGTTTGT     |
|                                                                                                            | <i>TRIM37</i>          | GGGACCAGCATTGGTACATTA    | CTGAGTTCGAGACAGCTCAATAG |
|                                                                                                            | <i>XDH</i>             | AGCCTCTCGCCATCTTTATTC    | TCTTTCAGCCTCAGCAACTC    |
| Lipid metabolism<br>(Human)<br><a href="http://amigo.geneontology.org/">http://amigo.geneontology.org/</a> | <i>ABCA1</i>           | GGTGGTGTCTTCTCCTCATTACT  | CCGCCTCACATCTTCATCTT    |
|                                                                                                            | <i>ACACA</i>           | GCAGGTCACACGTCTCTTTAT    | CCAGCCTGTCATCCTCAATATC  |
|                                                                                                            | <i>ACSL1</i>           | GACGAGCCCTTGGTGTATTT     | TTCATAGGGTGGTCTGGTTTC   |
|                                                                                                            | <i>AGPAT1</i>          | GAGGGAACGAGAAACCACAA     | TCTTGGTAGGAGGACATGACTA  |
|                                                                                                            | <i>CD36</i>            | CATTGGTGATGAGAAGGCAAAC   | CACCACACCAACTGAGTAA     |
|                                                                                                            | <i>FASN</i>            | CTAGGTTTGATGCCTCCTTCTT   | GATGGCTTCATAGGTGACTTCC  |
|                                                                                                            | <i>LDLR</i>            | CTCCCGCAAGATCAAGAAA      | GTTTGGAGTCAACCCAGTAGAG  |
|                                                                                                            | <i>PPARG</i>           | GCCTGCATCTCCACCTTATTA    | ATCTCCACAGACACGACATTC   |
|                                                                                                            | <i>SCD1</i>            | ACAACCTACCACACTCCTTTC    | GGAGACTTCTTCCGGTCATAG   |
| <i>VLDLR</i>                                                                                               | CAGGAAGATTGGCTTAGAGAGG | GCTTAGATCGGCCAGAATAG     |                         |
| Mitochondria<br>(Human)                                                                                    | <i>MCAD</i>            | TGCTGGTGCTGTTGGATTAG     | TGGTGCTCTACAAGTAGCTTTC  |
|                                                                                                            | <i>NDUFA8</i>          | GACCTGGGAGAAGTGTCAAAG    | CGGTCTTGGTCTTGAGTGATAG  |
|                                                                                                            | <i>SDHA</i>            | AGAGGGAGGCATTCTCATTAAC   | ACCGAGACACCACATCTCTA    |

|                                          |                                       |                         |                         |
|------------------------------------------|---------------------------------------|-------------------------|-------------------------|
|                                          | UQCR2                                 | CTCAGCAGCCATTTGATGTTTC  | TGTGGCCTGGGAGATAGTATAA  |
| CRC target<br>(Mouse)<br>Ref. 26         | Cene1                                 | CTGGATGTTGGCTGCTTAGA    | TCTATGTCGCACCACTGATAAC  |
|                                          | Bmi1                                  | CCAGACCACTCCTGAACATAAG  | GACGGGTGAGCTGCATAAA     |
|                                          | Ccl2                                  | CTCACCTGCTGCTACTCATTC   | ACTACAGCTTCTTTGGGACAC   |
|                                          | Cnd1<br>( $\beta$ -Catenin<br>target) | CAGAGGCGGATGAGAACAAAG   | GAGGGTGGGTTGGAAATGAA    |
|                                          | Cd16                                  | CAAGCCTGTCACCATCACTG    | GTGTCCACTGCAAACAGGAG    |
|                                          | Cd206                                 | AGTGGCTTTGGTTGAACGAC    | CCAAAGGCCCGAAGATGAAG    |
|                                          | Cd44<br>( $\beta$ -Catenin<br>target) | GAACCAGGACAGTGGAGTGA    | GCAGACGGCAAGAATCAGAG    |
|                                          | F4/80                                 | TGTACGTGCAACTCAGGACT    | GTGGGACCACAGAGAGTTGA    |
|                                          | Il1b                                  | CCACCTCAATGGACAGAATATCA | CCCAAGGCCACAGGTATTT     |
|                                          | Klf4                                  | CCCTTCGGTCATCAGTGTTAG   | GGACCGCCTCTTGCTTAAT     |
| KrasG12D<br>target<br>(Mouse)<br>Ref. 25 | Aqp8                                  | CTGTGTGATGGGTGCTGTC     | TTCATGCAGGCTCCAGAGAT    |
|                                          | Cdkn2a                                | GCTCTGGCTTTCGTGAACAT    | GTGAACGTTGCCCATCATCA    |
|                                          | Fgf8                                  | TTGGGAAAGCGGCTATTTGG    | TCCTCGTGTGTTCCACTGAT    |
|                                          | Pdx1                                  | AAGAGGACCCGTAAGCCTA     | TTCAACATCACTGCCAGCTC    |
|                                          | Qpct                                  | ACTCTTAACCCGGAAGCGAA    | CTCCCACAAACACTCTGCTG    |
|                                          | Qsta1                                 | AGCCATGGACAAGACTACCT    | TCAGAAGGCTGGCATCAAAC    |
|                                          | Slc16a9                               | GCAGCTTGCCAAGAGGAAAT    | TGAATAGCGCGGAGAAGACT    |
|                                          | Slc26a3                               | CTGCCATTCACGTTCTGGTT    | AGACCGACTCCAGGACTTTG    |
|                                          | Ttr                                   | CATGAATTCGCGGATGTGGT    | CCGTGGTGTGTAGGAGTAT     |
| $\beta$ -Catenin<br>targ<br>(Mouse)      | Myc                                   | CGCCTACATCCTGTCCATTC    | AAGCTGTTTCGAGTTTGTGTTTC |
|                                          | Mmp14                                 | CATCATTGAGGTGGATGAGGAG  | CCATGGCGTCTGAAGAAGAA    |
|                                          | Nos2                                  | ACAACCTACCACCACTCCTTTC  | GGAGACTTTCCTCCGGTCATAG  |
| Endogenous<br>control                    | Human<br>RN18S                        | CTGAGAAACGGCTACCAATC    | GCCTCGAAAGAGTCCTGTATTG  |
|                                          | Human<br>ACTB                         | AGGCACCAGGGCGTGAT       | GCCACATAGGAATCCTTCTGAC  |
|                                          | Mouse<br>Rn18s                        | CCAGTAAGTGCGGGTCATAAG   | GGCCTCACTAAACCATCCAA    |

## References

1. Park, S.; Oh, J.; Kim, Y.I.; Choe, S.K.; Chun, C.H.; Jin, E.J. Suppression of ABCD2 dysregulates lipid metabolism via dysregulation of miR-141:ACSL4 in human osteoarthritis. *Cell Biochem. Funct.* **2018**, *36*, 366–376, doi:10.1002/cbf.3356.
2. Schirripa, M.; Zhang, W.; Yang, D.; Cao, S.; Okazaki, S.; Loupakis, F.; Berger, M.D.; Ning, Y.; Miyamoto, Y.; Suenaga, M.; et al. NOS2 polymorphisms in prediction of benefit from first-line chemotherapy in metastatic colorectal cancer patients. *PLoS one* **2018**, *13*, e0193640, doi:10.1371/journal.pone.0193640.
3. Chen, L.D.; Liu, Z.H.; Zhang, L.F.; Yao, J.N.; Wang, C.F. Sanggenon C induces apoptosis of colon cancer cells via inhibition of NO production, iNOS expression and ROS activation of the mitochondrial pathway. *Oncol. Rep.* **2017**, *38*, 2123–2131, doi:10.3892/or.2017.5912.
4. Dabbeche-Bouricha, E.; Hadji-Abbes, N.; Abdelmaksoud-Damak, R.; Alaya, N.; Ayadi, W.; Charfi, S.; Khabir, A.; Sellami-Boudawara, T.; Mokdad-Gargouri, R. Quantitative measurement of iNOS expression in melanoma, nasopharyngeal, colorectal, and breast tumors of Tunisian patients: comparative study and clinical significance. *Tumour Biol.* **2016**, *37*, 5153–5164, doi:10.1007/s13277-015-4303-4.
5. Fransen, K.; Elander, N.; Soderkvist, P. Nitric oxide synthase 2 (NOS2) promoter polymorphisms in colorectal cancer. *Cancer Lett.* **2005**, *225*, 99–103, doi:10.1016/j.canlet.2005.02.006.
6. Reddy, B.S.; Hirose, Y.; Cohen, L.A.; Simi, B.; Cooma, I.; Rao, C.V. Preventive potential of wheat bran fractions against experimental colon carcinogenesis: implications for human colon cancer prevention. *Cancer Res.* **2000**, *60*, 4792–4797.
7. Puglisi, M.A.; Cenciarelli, C.; Tesori, V.; Cappellari, M.; Martini, M.; Di Francesco, A.M.; Giorda, E.;

- Carsetti, R.; Ricci-Vitiani, L.; Gasbarrini, A. High nitric oxide production, secondary to inducible nitric oxide synthase expression, is essential for regulation of the tumour-initiating properties of colon cancer stem cells. *J. Pathol.* **2015**, *236*, 479–490, doi:10.1002/path.4545.
8. Skrzycki, M.; Majewska, M.; Podsiad, M.; Czczot, H. Expression and activity of superoxide dismutase isoenzymes in colorectal cancer. *Acta Biochim. Pol.* **2009**, *56*, 663–670.
  9. Bamodu, O.A.; Yang, C.K.; Cheng, W.H.; Tzeng, D.T.W.; Kuo, K.T.; Huang, C.C.; Deng, L.; Hsiao, M.; Lee, W.H.; Yeh, C.T. 4-Acetyl-Antroquinonol B Suppresses SOD2-Enhanced Cancer Stem Cell-Like Phenotypes and Chemoresistance of Colorectal Cancer Cells by Inducing hsa-miR-324 re-Expression. *Cancers* **2018**, *10*, doi:10.3390/cancers10080269.
  10. Janssen, A.M.; Bosman, C.B.; Kruidenier, L.; Griffioen, G.; Lamers, C.B.; van Krieken, J.H.; van de Velde, C.J.; Verspaget, H.W. Superoxide dismutases in the human colorectal cancer sequence. *J. Cancer Res. Clin. Oncol.* **1999**, *125*, 327–335, doi:10.1007/s004320050282.
  11. Nozoe, T.; Honda, M.; Inutsuka, S.; Yasuda, M.; Korenaga, D. Significance of immunohistochemical expression of manganese superoxide dismutase as a marker of malignant potential in colorectal carcinoma. *Oncol. Rep.* **2003**, *10*, 39–43.
  12. Mohr, A.; Buneker, C.; Gough, R.P.; Zwacka, R.M. MnSOD protects colorectal cancer cells from TRAIL-induced apoptosis by inhibition of Smac/DIABLO release. *Oncogene* **2008**, *27*, 763–774, doi:10.1038/sj.onc.1210673.
  13. Wang, F.; Wu, J.; Qiu, Z.; Ge, X.; Liu, X.; Zhang, C.; Xu, W.; Hua, D.; Qi, X.; Mao, Y. ACOT1 expression is associated with poor prognosis in gastric adenocarcinoma. *Hum. Pathol.* **2018**, *77*, 35–44, doi:10.1016/j.humpath.2018.03.013.
  14. Konno, H.; Minamiya, Y.; Saito, H.; Imai, K.; Kawaharada, Y.; Motoyama, S.; Ogawa, J. Acquired xanthine dehydrogenase expression shortens survival in patients with resected adenocarcinoma of lung. *Tumour Biol.* **2012**, *33*, 1727–1732, doi:10.1007/s13277-012-0431-2.
  15. Chen, W.C.; Wang, C.Y.; Hung, Y.H.; Weng, T.Y.; Yen, M.C.; Lai, M.D. Systematic Analysis of Gene Expression Alterations and Clinical Outcomes for Long-Chain Acyl-Coenzyme A Synthetase Family in Cancer. *PLoS one* **2016**, *11*, e0155660, doi:10.1371/journal.pone.0155660.
  16. Tang, Y.; Zhou, J.; Hooi, S.C.; Jiang, Y.M.; Lu, G.D. Fatty acid activation in carcinogenesis and cancer development: Essential roles of long-chain acyl-CoA synthetases. *Oncol. Lett.* **2018**, *16*, 1390–1396, doi:10.3892/ol.2018.8843.
  17. Kuwata, H.; Hara, S. Role of acyl-CoA synthetase ACSL4 in arachidonic acid metabolism. *Prostaglandins Other Lipid Mediat.* **2019**, *144*, 106363, doi:10.1016/j.prostaglandins.2019.106363.
  18. Benjamin, D.I.; Cozzo, A.; Ji, X.; Roberts, L.S.; Louie, S.M.; Mulvihill, M.M.; Luo, K.; Nomura, D.K. Ether lipid generating enzyme AGPS alters the balance of structural and signaling lipids to fuel cancer pathogenicity. *Proc. Natl. Acad. Sci. USA* **2013**, *110*, 14912–14917, doi:10.1073/pnas.1310894110.
  19. Hlavata, I.; Mohelnikova-Duchonova, B.; Vaclavikova, R.; Liska, V.; Pitule, P.; Novak, P.; Bruha, J.; Vycital, O.; Holubec, L.; Treska, V.; et al. The role of ABC transporters in progression and clinical outcome of colorectal cancer. *Mutagenesis* **2012**, *27*, 187–196, doi:10.1093/mutage/ger075.
  20. Lauer, C.; Volkl, A.; Riedl, S.; Fahimi, H.D.; Beier, K. Impairment of peroxisomal biogenesis in human colon carcinoma. *Carcinogenesis* **1999**, *20*, 985–989, doi:10.1093/carcin/20.6.985.
  21. Yeh, C.S.; Wang, J.Y.; Cheng, T.L.; Juan, C.H.; Wu, C.H.; Lin, S.R. Fatty acid metabolism pathway play an important role in carcinogenesis of human colorectal cancers by Microarray-Bioinformatics analysis. *Cancer Lett.* **2006**, *233*, 297–308, doi:10.1016/j.canlet.2005.03.050.
  22. Abu-Remaileh, M.; Bender, S.; Raddatz, G.; Ansari, I.; Cohen, D.; Gutekunst, J.; Musch, T.; Linhart, H.; Breiling, A.; Pikarsky, E.; et al. Chronic inflammation induces a novel epigenetic program that is conserved in intestinal adenomas and in colorectal cancer. *Cancer Res.* **2015**, *75*, 2120–2130, doi:10.1158/0008-5472.CAN-14-3295.
  23. Luo, W.; Qin, L.; Li, B.; Liao, Z.; Liang, J.; Xiao, X.; Mo, Y.; Huang, G.; Zhang, Z.; Zhou, X.; et al. Inactivation of HMGCL promotes proliferation and metastasis of nasopharyngeal carcinoma by suppressing oxidative stress. *Sci. Rep.* **2017**, *7*, 11954, doi:10.1038/s41598-017-11025-2.
